# Supervised learning sets benchmark for robust spike rate inference from calcium imaging signals

Lucas Theis<sup>1,2\*</sup>, Philipp Berens<sup>§\*1,2,3,4,5</sup>, Emmanouil Froudarakis<sup>4</sup>, Jacob Reimer<sup>4</sup>, Miroslav Román Rosón<sup>1,5</sup>, Tom Baden<sup>1,3,5</sup>, Thomas Euler<sup>1,3,5</sup>, Andreas Tolias<sup>3,4,6</sup>, Matthias Bethge<sup>1,2,3§</sup>

<sup>1</sup> Centre for Integrative Neuroscience, University of Tübingen, Tübingen, Germany

<sup>2</sup> Institute of Theoretical Physics, University of Tübingen, Tübingen, Germany

<sup>3</sup> Bernstein Center for Computational Neuroscience, University of Tübingen, Tübingen, Germany

<sup>4</sup> Department of Neuroscience, Baylor College of Medicine, Houston, USA

<sup>5</sup> Institute for Ophthalmic Research, University of Tübingen, Tübingen, Germany

<sup>6</sup> Department of Computational and Applied Mathematics, Rice University, Houston, USA

\* These authors contributed equally to this work.

§ To whom correspondence should be addressed:

Philipp Berens, [philipp.berens@uni-tuebingen.de](mailto:philipp.berens@uni-tuebingen.de)

Matthias Bethge, [matthias.bethge@uni-tuebingen.de](mailto:matthias.bethge@uni-tuebingen.de)

## Summary

A fundamental challenge in calcium imaging has been to infer spike rates of neurons from the measured noisy calcium fluorescence traces. We systematically evaluate a range of spike inference algorithms on a large benchmark dataset (>100.000 spikes) recorded from varying neural tissue (V1 and retina) using different calcium indicators (OGB-1 and GCaMP6). We introduce a new algorithm based on supervised learning in flexible probabilistic models and show that it outperforms all previously published techniques. Importantly, it even performs better than other algorithms when applied to entirely new datasets for which no simultaneously recorded data is available. Future data acquired in new experimental conditions can easily be used to further improve its spike prediction accuracy and generalization performance. Finally, we show that comparing algorithms on artificial data is not informative about performance on real data, suggesting that benchmark datasets such as the one we provide may greatly facilitate future algorithmic developments.

## 1 Introduction

2 Over the past two decades, two-photon imaging has become one of the most widely used  
3 techniques for studying information processing in neural populations in vivo (Denk et al.,  
4 1990; Kerr and Denk, 2008). Typically, a calcium indicator such as the synthetic dye Oregon  
5 green BAPTA-1 (OGB-1) (Stosiek et al., 2003) or the genetically encoded GCaMP6 (Chen et  
6 al., 2013) is used to image a large fraction of cells in a neural tissue. Individual action  
7 potentials lead to a fast rise in fluorescence, followed by a slow decay with a time constant of  
8 several hundred milliseconds (Chen et al., 2013; Kerr et al., 2005). Commonly, neural  
9 population activity from dozens or hundreds of cells is imaged using relatively slow scanning  
10 speeds (<15 Hz), but novel fast scanning methods (Cotton et al., 2013; Grewe et al., 2010;  
11 Valmianski et al., 2010) (up to several 100 Hz) have opened additional opportunities for  
12 studying neural population activity at increased temporal resolution.

13 A fundamental challenge has been to infer the timing of action potentials from the measured  
14 noisy calcium fluorescence traces. To solve this problem of spike inference, several different  
15 approaches have been proposed, including template-matching (Greenberg et al., 2008;  
16 Grewe et al., 2010; Oñativia et al., 2013) and deconvolution (Park et al., 2013;  
17 Pnevmatikakis et al., 2013, 2014; Vogelstein et al., 2009, 2010; Yaksi and Friedrich, 2006).  
18 These methods have in common that they assume a forward generative model of calcium  
19 signal generation which is then inverted to infer spike times. These forward models  
20 incorporate strong a-priori assumptions about the shape of the calcium fluorescence signal  
21 induced by a single spike and the statistics of the noise. Alternatively, simple supervised  
22 learning techniques have been used to learn the relationship between calcium signals and  
23 spikes from data (Sasaki et al., 2008).

24 However, it is currently not known which approach is most successful at inferring spikes  
25 under experimental conditions, as a detailed quantitative comparison of different algorithms  
26 on large datasets of *in vitro* and *in vivo* population imaging data has been lacking. Rather,  
27 most published algorithms have only been evaluated on relatively small experimental  
28 datasets using different performance measures. In addition, the question of how well we can  
29 reconstruct the spikes of neurons given calcium measurements has been studied  
30 theoretically or using simulated datasets (Lütcke et al., 2013; Wilt et al., 2013). While such  
31 studies offer the advantage that many model parameters are under the control of the  
32 investigator, they do not answer the question of how well we can reconstruct spikes from  
33 actual measurements.

34 Here, we pursue two goals: (1) we introduce a new data-driven approach based on  
35 supervised learning in flexible probabilistic models to infer spikes from calcium fluorescence  
36 traces and (2) we systematically evaluate a range of spike inference algorithms  
37 ('benchmarking') on a large dataset including simultaneous measurements of spikes and  
38 calcium signals in primary visual cortex and the retina of mice using OGB-1 and GCaMP6 as  
39 calcium indicators collected in anesthetized and awake animals. We show that our new  
40 method outperforms all previously published techniques, setting the current standard for  
41 spike inference from calcium signals.

## 42 Results

### 43 A flexible probabilistic model for spike inference

44 Here we introduce a new algorithm for spike inference from calcium data. We propose to  
45 model the probabilistic relationship between a segment of the fluorescence trace  $x_t$  and the  
46 number of spikes  $k_t$  in a small time bin, assuming they are Poisson distributed with rate  
47  $\lambda(x_t)$ :

$$p(k_t | x_t) = \frac{\lambda(x_t)^{k_t}}{k_t!} e^{-\lambda(x_t)}.$$

48

49 Instead of relying on a specific forward model, we parameterize the firing rate  $\lambda(x_t)$  using a  
50 recently introduced extension of generalized linear models, the factored spike-triggered  
51 mixture (STM) model (Theis et al., 2013) (Fig. 1a; see Methods):

$$\lambda_{\text{STM}}(x_t) = \sum_{k=1}^K \exp\left(\sum_{m=1}^M \beta_{km} (\mathbf{u}_m^\top x_t)^2 + \mathbf{w}_k^\top x_t + b_k\right).$$

52 We train this model on simultaneous recordings of spikes and calcium traces to learn a set of  
53  $K$  linear features  $\mathbf{w}_k$  and  $M$  quadratic features  $\mathbf{u}_m$  ('supervised learning'), which are  
54 predictive of the occurrence of spikes in the fluorescence trace. Importantly, this model is  
55 sufficiently flexible to capture non-linear relationships between fluorescence traces and  
56 spikes, but at the same time is sufficiently restricted to avoid overfitting when little data is  
57 available. Below we will evaluate whether this model is too simple or already more complex  
58 than necessary by comparing its performance to that of multi-layer neural networks and  
59 simple LNP-type models.

60 *Fig. 1: Spike inference from calcium measurements*

61 In contrast to many methods that result in a single most likely spike train (a 'point estimate')  
62 using a probabilistic model in this way provides us with an estimate of the expected firing  
63 rate,  $\lambda(x_t)$ , and a distribution over spike counts, as fully Bayesian methods do  
64 (Pnevmatikakis et al., 2013, 2014; Vogelstein et al., 2009). An advantage of access to a  
65 distribution over spike trains is that it allows us, for example, to estimate the uncertainty in  
66 the predictions. Example spikes trains consistent with the calcium measurements can be  
67 easily generated from our model without spending considerable computational resources. .  
68 While generating a 'most likely spike train' is also possible, its interpretation is less clear, as  
69 the result depends on the parametrization.

### 70 Benchmarking spike inference algorithms on experimental data

71 To quantitatively evaluate different spike inference approaches including our model, we  
72 acquired a large benchmark dataset with a total of 90 traces of 73 neurons, in which we  
73 simultaneously recorded calcium signals and spikes (Fig. 1b; in total >100,000 spikes).  
74 These cells were recorded with different scanning methods, different calcium indicators, in  
75 different brain states and at different sampling rates (see *Table 1* and *Methods*). We used  
76 four datasets for our main analysis Dataset 1 consisted of 16 neurons recorded *in-vivo* in V1  
77 of anesthetized mice using fast 3D AOD-based imaging (Cotton et al., 2013) at ~320 Hz with  
78 OGB-1 as indicator. Dataset 2 consisted of 31 neurons recorded *in-vivo* in anesthetized  
79 mouse V1 using raster scanning at ~12 Hz with OGB-1 as indicator. Dataset 3 consisted of

80 19 segments recorded from 11 neurons in-vivo in anesthetized mouse V1 using the genetic  
81 calcium indicator GCaMP6s with a resonance scanner at ~59 Hz. Finally, dataset 4 consisted  
82 of 9 retinal ganglion cells recorded *ex-vivo* at ~8 Hz using raster scanning with OGB-1 as  
83 indicator (Briggman and Euler, 2011). In addition, we collected a small dataset of 6 cells from  
84 V1 of awake mice using again the genetic calcium indicator GCaMP6s (Reimer et al., 2014)  
85 to demonstrate the performance during awake imaging (see *below*). We resampled the  
86 calcium traces from all datasets to a common resolution of 100 Hz. Importantly, all of our  
87 datasets were acquired at a zoom factor commonly used in population imaging such that the  
88 signal quality should match well that commonly encountered in these preparations (see  
89 *Table 1*).

90 We compared the performance of our algorithm (*STM*) to that of algorithms representative of  
91 the different approaches (see *Table 2* and *Methods*), including simple deconvolution (*YF06*,  
92 Yaksi and Friedrich, 2006), MAP (*VP10*, known as ‘fast-oopsi’, Vogelstein et al., 2010) and  
93 Bayesian inference (*PP14*, Pnevmatikakis et al., 2014; *VP09*, Vogelstein et al., 2009) in  
94 generative models, template-matching by finite rate of innovation (*OD13*, Oñativia et al.,  
95 2013) and supervised learning using a support vector machine (*SI08*, Sasaki et al., 2008). To  
96 provide a baseline level of performance, we evaluated how closely the calcium trace followed  
97 the spike train without any further processing (*raw*).

98 We focus on two measures of spike reconstruction performance to provide a quantitative  
99 evaluation of the different techniques: (i) the correlation between the original and the  
100 reconstructed spike train and (ii) the information gained about the spike train based on the  
101 calcium signal (see *Methods*). For completeness, we computed (iii) the area under the ROC  
102 curve (AUC), which has also been used in the literature. The AUC score is a less sensitive  
103 measure of spike reconstruction performance, as e.g. an algorithm could consistently  
104 overestimate high rates compared to low rates and yet yield the same AUC (for a more  
105 technical discussion, see *Methods*).

106 To provide a fair comparison between the different algorithms, we evaluated their  
107 performance using leave-one-out cross-validation: we estimated the parameters of the  
108 algorithms on all but one cell from a dataset and tested them on the one remaining cell,  
109 repeating this procedure for each cell in the dataset (see *Methods*). For the algorithms based  
110 on generative models, we selected the hyperparameters during cross-validation (*VP10*,  
111 *VP09*) or using a sampling based approach (*PP14*; see *Methods*).

## 112 **Supervised learning sets benchmark**

113 We found that the spike density function predicted by our algorithm matched the true spike  
114 train closely, for cells from each dataset including both indicators OGB-1 and GCaMP6 (Fig.  
115 1c-f). The other tested algorithms generally showed worse prediction performance: For  
116 example, *YF06* typically resulted in very noisy estimates of the spike density function (Fig.  
117 1c-f) and both *VP10* and *PP14* frequently missed single spikes (Fig. 1d-f, marked by  
118 asterisk) and had difficulties modeling the dynamics of the GCaMP6 indicator (Fig. 1e).

119 Figure 2: Quantitative evaluation of spike inference performance

120 A quantitative comparison revealed that our *STM* method reconstructed the true spike trains  
121 better than all its competitors, yielding a consistently higher correlation and information gain  
122 for all four datasets (Fig. 2a, b; evaluated at 25 Hz; for statistics, see figure). The median  
123 improvement in correlation across all recordings achieved by the *STM* over its two closest

124 competitors was 0.12 (0.07-0.14; median and bootstrapped 95%-confidence interval, N=75)  
125 for *SI08* – the other supervised learning approach based on SVMs – and 0.1 (0.08-0.13) for  
126 *PP14* – the Bayesian inference in a generative model – yielding a median improvement of  
127 33% and 32%, respectively. Similarly, the STM explained 6.8 (5.0-7.7; *SI08*) and 9.6 (8.1-  
128 12.1; *PP14*) percent points more marginal entropy (measured by the relative information  
129 gain).

130 When evaluated with respect to AUC, the performance of these two algorithms was about as  
131 good as that of the STM model (Suppl. Fig. 1), yielding a median difference in AUC of -0.01  
132 (-0.02-0.01) and 0.01 (-0.01-0.02). This is because the AUC is the least sensitive of the three  
133 measures, as discussed above. As a side remark, note that AUC is closely related to the cost  
134 function optimized by *SI08*, which is based on a support vector machine. To show that the  
135 features extracted by our STM algorithm are more informative about the spike rate than  
136 those used by *SI08*, one can use a SVM on top of these features and obtain on 3 out of 4  
137 datasets higher performance than *SI08* (Suppl. Fig. 1).

### 138 *Figure 3: Temporal accuracy of spike inference*

139 The timing accuracy of our method was also superior to that of the other algorithms. To test  
140 this, we evaluated the performance of all algorithms for a wide range of sampling rates  
141 between 2 and 100 Hz, corresponding to time bins between 10 and several hundreds of  
142 milliseconds (Fig. 3). The STM performed better than the other algorithms for most sampling  
143 rates, but its performance advantage was particularly large for high sampling rates (Fig. 3;  
144 also Suppl. Fig. 2) Concretely, if the desired average correlation between inferred and true  
145 spike rates was 0.4, our method can achieve that with time bins of ~17 ms, whereas  
146 competing methods required ~29 and ~58 ms (*PP14* and *SI08*, respectively; evaluated on  
147 dataset 1, Fig. 3a). Interestingly, *VP10* ('fast-oopsi') performed similar to our method for low  
148 sampling rates, but its performance deteriorated consistently on all datasets to the  
149 performance level of *VF06* with increasing sampling rates (Fig. 3).

### 150 *Figure 4: Evaluating model complexity*

151 The performance of the STM model could not be further improved using a more flexible  
152 multilayer neural network for modeling the non-linear rate function  $\lambda_t$  (Fig. 4 and Suppl. Fig.  
153 3). To test this, we replaced the STM model by a neural network with two hidden layer, but  
154 found that this change resulted in only marginal performance improvement (Fig. 4). In  
155 addition, we tested whether a much simpler linear-nonlinear model would suffice to model  
156  $\lambda_t$ . We found that the STM model performed significantly better than the simple LNP model  
157 (Fig. 4 and Suppl. Fig. 3). Therefore, the choice of the STM for  $\lambda_t$  seems to provide a good  
158 compromise between flexibility of the model structure and generalization performance.

159 Importantly, already a small training set of less than 10 cells was sufficient to achieve good  
160 performance for the STM model (Fig. 5a and b and Suppl. Fig. 4a). We tested the prediction  
161 performance of the STM with training sets of various sizes and found that it saturated  
162 between 5 and 10 cells for all datasets, arguing that a few simultaneously recorded cells may  
163 suffice to directly adapt the algorithms to new datasets acquired in other laboratories or with  
164 new imaging methods. Finally, the superior performance of the STM was largely independent  
165 of the firing rate of the neuron within the limited range of firing rate in our sample of cells (Fig.  
166 5c and d and Suppl. Fig. 4b).

### 167 *Figure 5: Performance as a function of training set size and firing rate*



168

## 169 **Generalization of performance to new datasets**

170 We tested how well our algorithm performs if no simultaneous spike-calcium recordings are  
171 available for a new preparation, scanning method or calcium indicator or if a researcher  
172 wants to apply our algorithm without collecting simultaneous spike-calcium recordings for  
173 training. Remarkably, the STM model was able to generalize to new data sets that were  
174 recorded under different conditions than the data used for training. To test this, we trained  
175 the algorithms on three of the datasets and evaluated it on the remaining one (Fig. 6a) – that  
176 is, we applied the algorithm to an entirely new set of cells not seen at all during training. The  
177 STM algorithm still showed better performance compared to all other algorithms (Fig. 6b-c  
178 and Suppl. Fig. 5), including superior performance on the GCamp6-dataset when trained  
179 solely on the three OGB-datasets (Fig. 6b-c).

180 *Figure 6: Spike inference without training data*Next, we tested whether the algorithm's  
181 performance would also transfer to recordings in awake animals (Reimer et al., 2014). Brain  
182 movements and brain state fluctuations may induce additional variability in the recordings  
183 which may render spike inference under these conditions more difficult. We found that the  
184 STM trained on all neurons recorded in anesthetized animals or *ex-vivo* retina (n=75 traces  
185 from 70 cells) data outperforms all other algorithms also on awake data (n=15 traces from 6  
186 cells; Fig. 6d-f). Finally, we tested the different algorithms on three data sets acquired  
187 focusing on individual cells (in contrast to our population imaging dataset; n=29 cells; data  
188 publicly available from Svoboda lab, see *Methods*). Similarly to above, our algorithm was  
189 trained two of these datasets and tested on the third. In addition, we included all cells from  
190 datasets 1-4 in to the training set, as there are only comparably few spikes in the Svoboda  
191 lab datasets. Focusing on individual cells makes the data less noisy, resulting on overall  
192 higher correlation and AUC values (Suppl. Fig. 6). The STM algorithm performed well and on  
193 a par with VP10 regarding all three measures used for evaluation (Suppl. Fig. 6).

194 Taken together, this analysis indicates that good performance can be expected for our  
195 algorithm when it is directly applied on novel datasets without further training (see  
196 *Discussion*). A pre-trained version of our algorithm is available for download (see *Methods*).

## 197 **Comparisons on artificial data**

198 Surprisingly, the performance of the algorithms on simulated data was not predictive of the  
199 performance of the algorithms on the real datasets (Fig. 7). To test this, we simulated data  
200 from a simple biophysical model of calcium fluorescence generation (Fig. 7a, see *Methods*,  
201 Vogelstein et al., 2009). We then applied the same cross-validation procedure as before to  
202 evaluate the performance of the algorithms (Fig. 7b). Not surprisingly, we found that all  
203 algorithms based on this or a similar generative model (*PP13*, *VP10*, *YF06*) performed  
204 remarkably well. Interestingly, even the algorithms that performed worse than the baseline  
205 model for the real data (*OD13*, *VP09*) showed good performance on the artificial data. The  
206 STM model was among the top-performing algorithms, in contrast to the other supervised  
207 learning algorithm (*SI08*). A direct comparison of the performance on the simulated dataset  
208 and the experimental data clearly illustrates that the former is not a good predictor of the  
209 latter (Fig. 7c).

210 *Figure 7: Evaluating algorithms on artificial data*

## 211 Discussion

212 We introduced a new algorithm for inferring spikes from calcium traces based on supervised  
213 training of a flexible probabilistic model. We showed that this model performs better than all  
214 previously published algorithms for this problem, for a wide range of recording conditions  
215 including OGB-1 and GCamp6 as calcium indicators, anesthetized and awake imaging,  
216 different scanning techniques, neural tissues, and with respect to different metrics.  
217 Importantly, once trained, inferring spike rates using our algorithm is very fast, so even very  
218 large datasets can be processed rapidly. Interestingly, two of the three best algorithms rely  
219 on supervised learning to infer the relationship between calcium signal and spikes,  
220 suggesting that a data-driven approach offers distinct advantages over approaches based on  
221 forward models of the relationship between the two signals.

222 The superior performance of our algorithm carried over to new datasets not seen during  
223 training, promising good spike inference performance even when applied to a new dataset  
224 where no simultaneous recordings are available. To use the algorithm 'out of the box', we  
225 provide it for download pre-trained with all experimental data used in this paper. In particular,  
226 its performance carried over to data recorded in awake animals, where brain movements or  
227 brain state fluctuations may render spike inference more difficult. This result may not be  
228 surprising, given that motion artefacts along the X- and Y-axis can be very well compensated  
229 by motion correction algorithms (Greenberg et al., 2008) and motion in the Z-axis is only on  
230 the order of 1-2  $\mu\text{m}$  in good preparations (Reimer et al., 2014).

231 The fact that our algorithm can be used without extra training data is crucial, as this is often  
232 considered an important advantage of algorithms based on generative models. Note that for  
233 entirely new experimental conditions (e.g. a new calcium indicator), the performance of  
234 neither class of algorithms is guaranteed, however, and both need to be evaluated on a  
235 dataset with simultaneous recordings. For unsupervised methods, if such an evaluation  
236 reveals poor performance, e.g. because the assumed generative model does not match the  
237 structure of the dataset at hand (as seen e.g. with the GCamp6 data; Fig. 1e and 2), the only  
238 way to improve the algorithm would be to adapt the generative model and modify the  
239 inference procedures accordingly. In contrast, any simultaneous data collected in the future  
240 can be readily used to retrain our supervised algorithm and further improve its spike  
241 prediction and generalization performance. In fact, our choice of the spike triggered mixture  
242 model for estimating spikes from calcium traces is motivated by its ability to automatically  
243 switch between different sub-models whenever the statistics of the data changes (Theis et  
244 al., 2013).

245 Our evaluation shows that the correlation between inferred and real spike rates obtained at a  
246 temporal resolution of 25 Hz (or in bins of 40 ms) is at best 0.4-0.6, depending on the dataset  
247 with substantial variability between cells (Fig. 5c-d). It will be an interesting question whether  
248 new indicators (Chen et al., 2013; Inoue et al., 2014; St-Pierre et al., 2014; Thestrup et al.,  
249 2014) or scanning techniques on and better inference algorithms will bring these values  
250 closer to 1, or whether these low correlations reflect a general limitation of population  
251 imaging approaches. Factors contributing to this limitation may include technical aspects of  
252 the imaging procedure such as neuropil contamination or activity-induced changes in blood  
253 vessel diameter and biophysical issues connected to the intracellular calcium dynamics. Our  
254 evaluation further shows that good spike inference performance on model data by no means  
255 guarantees good performance on real population imaging data (Fig. 6c). We believe  
256 theoretical model based studies (Lütcke et al., 2013; Wilt et al., 2013) will remain useful to

257 systematically explore how performance depends on model parameters, such as noise level  
258 or violations of the generative model, but will need to be followed up by systematic  
259 quantitative benchmark comparisons on datasets such as provided here.

260 Our proposed method is solely concerned with the problem of spike inference, and does not  
261 infer the regions of interests (ROIs) from observed data. Rather, we assume that these are  
262 obtained by the experimenter through other semi-automatic or automatic techniques.  
263 Recently, several methods have been proposed to jointly infer ROIs and spikes (Diego and  
264 Hamprecht, 2014; Maruyama et al., 2014; Pnevmatikakis et al., 2014). These methods have  
265 the benefit that they exploit the full spatio-temporal structure of the problem of spike  
266 inference in calcium imaging and offer an unbiased approach for ROI placement. Since ROIs  
267 can also be placed using supervised learning (Valmianski et al., 2010), it should be feasible  
268 to develop supervised paradigms for simultaneous ROI placement and spike inference or  
269 combinations of unsupervised and supervised methods.

270 We presented the first quantitative benchmarking approach to evaluating spike inference  
271 algorithms on a large dataset of population imaging data. We believe that such a  
272 benchmarking approach which is already used successfully in machine learning and related  
273 fields to drive new algorithmic developments can also be an important catalyst for  
274 improvements on various computational problems in neuroscience, from systems  
275 identification to neuron reconstruction.



## 276 **Methods**

### 277 **Datasets**

#### 278 *Primary visual cortex (V1) – OGB-1*

279 We recorded calcium traces from neural populations in layer 2/3 of anesthetized wild type  
280 mice (male C57CL/6J, age: p40–p60) using a custom-built two-photon microscope using  
281 previously described methods (Cotton et al., 2013; Froudarakis et al., 2014). Briefly, the  
282 temperature of the mouse was maintained between 36.5 °C and 37.5 °C throughout the  
283 experiment using a homeothermic blanket system (Harvard Instruments). While recording we  
284 either provided no visual stimulation, moving gratings, or natural and phase scrambled  
285 movies as previously described (Froudarakis et al., 2014). A ~1 mm craniotomy was  
286 performed over the primary visual cortex of the mouse. The details of surgical techniques and  
287 anesthesia protocol have been described elsewhere (Cotton et al., 2013). We then used  
288 bolus-loaded Oregon green BAPTA-1 (OGB-1, Invitrogen) as calcium indicator and the  
289 injections were performed by using a continuous-pulse low pressure protocol with a glass  
290 micropipette to inject ~300  $\mu\text{m}$  below the surface of the cortex. The cortical window was  
291 sealed using a glass coverslip. After allowing 1h for the dye uptake we recorded calcium  
292 traces using a custom-built two-photon microscope equipped with a Chameleon Ti-sapphire  
293 laser (Coherent) tuned at 800 nm and a 20 $\times$ , 1.0 NA Olympus objective. Scanning was  
294 controlled by either a set of galvanometric mirrors (*Galvo*) or a custom-built acousto-optic  
295 deflector system (*AODs*) (Cotton et al., 2013). The average power output of the objective was  
296 kept < 50 mW for galvanometric scanning and 120 mW for AODs. Calcium activity was  
297 typically sampled at ~12 Hz with the galvanometric mirrors and at ~320 Hz with the AODs.  
298 The field of view was typically 200x200x100 $\mu\text{m}$  and 250x250 $\mu\text{m}$  for AODs and galvanometric  
299 imaging, respectively, imaging dozens to hundreds of neurons simultaneously (Cotton et al.,  
300 2013). To perform simultaneous loose-patch and two-photon calcium imaging recordings, we  
301 used glass pipettes with 5–7 M $\Omega$  resistance filled with Alexa Fluor 594 (Invitrogen) for  
302 targeted two-photon-guided loose cell patching of single cells. Spike times were extracted by  
303 thresholding. All procedures performed on mice were conducted in accordance with the  
304 ethical guidelines of the National Institutes of Health and were approved by the Baylor  
305 College of Medicine IACUC.

#### 306 *Primary visual cortex (V1) – GCaMP6*

307 We recorded calcium traces from neural populations in layer 2/3 of (1) isoflurane-  
308 anesthetized and (2) awake wild type mice (male C57CL/6J, age: 2-8 months; N=2 and N=1  
309 mice for anesthetized and awake, respectively) using a resonant scanning microscope  
310 (ThorLabs). Surgical procedures were similar to those described in Reimer et al (2014).  
311 Briefly, mice were initially injected with approximately 1  $\mu\text{L}$  of  
312 AAV1.Syn.GCamp6s.WPRE.SV40 (University of Pennsylvania Vector Core) through a burr  
313 hole. The injection was performed with the pipette at a steep (~60 deg) angle, in order to  
314 infect cells in the cortex lateral to the injection site under an untouched region of the skull.  
315 The mice were allowed to recover and were returned to their cages. Typically three to five  
316 weeks later (4 months for the awake experiment), a 3 mm circular craniotomy was performed  
317 above the injection site and the craniotomy was sealed with a circular 3 mm coverslip with a  
318 ~0.5  $\mu\text{m}$  hole to allow pipette access to infected cells. For anesthetized experiments, the  
319 temperature of the mouse was maintained between 36.5 °C and 37.5 °C throughout the  
320 experiment using a homeothermic blanket system (Harvard Instruments). During awake  
321 experiments, the mouse was placed on a treadmill with its head restrained beneath the

322 microscope objective (Reimer et al., 2014). Recordings were of spontaneous activity without  
323 visual stimulation, and injected current was manually adjusted to maintain a moderate level  
324 of firing. Calcium traces were recorded using a Chameleon Ti-sapphire laser (Coherent)  
325 tuned at 920 nm and a 16x, .85 NA Nikon objective. The average power output of the  
326 objective was kept < 40 mW. To perform simultaneous loose-patch and two-photon calcium  
327 imaging recordings, we used glass pipettes with 7–10 M $\Omega$  resistance filled with ACSF and  
328 Alexa Fluor 594 (Invitrogen) as described above. For awake data, imaging data was motion  
329 corrected in the X-Y plane with post-hoc raster correction and sub-pixel motion correction  
330 prior to extracting calcium traces. Motion along the Z-axis could not be corrected, but **could**  
331 **be measured via correlation with a surrounding stack and in good preparations** was typically  
332 small (running: mean 1.2  $\mu\text{m}$ , s.d. 0.6 $\mu\text{m}$ ; quiet: mean 0.88  $\mu\text{m}$ , s.d. 0.46  $\mu\text{m}$ ; data from  
333 (Reimer et al., 2014)). Calcium traces were extracted after manually segmenting patched  
334 cells and spike times were extracted by thresholding after excluding any periods where the  
335 patch was deemed unstable or of low quality. All procedures performed on mice were  
336 conducted in accordance with the ethical guidelines of the National Institutes of Health and  
337 were approved by the Baylor College of Medicine IACUC.

### 338 *Retina*

339 Imaging experiments were performed as described previously (Briggman and Euler, 2011).  
340 In short, the retina was enucleated and dissected from dark-adapted wild-type mice (both  
341 genders, C57BL/6J, p21-42), flattened, mounted onto an Anodisc (13, 0.1 mm pores,  
342 Whatman) with ganglion cells facing up, and electroporated with Oregon green BAPTA-1  
343 (OGB-1, Invitrogen). The tissue was placed under the microscope, where it was constantly  
344 perfused with tempered (36°C) carboxygenated (95% O<sub>2</sub>, 5% CO<sub>2</sub>) artificial cerebral spinal  
345 fluid (ACSF). Cells were left to recover for at least 1 hour before recordings were performed.  
346 We used a MOM-type two-photon microscope equipped with a mode-locked Ti:Sapphire  
347 laser (MaiTai-HP DeepSee, Newport Spectra-Physics) tuned to 927 nm (Euler et al., 2009).  
348 OGB-1 Fluorescence was detected at 520 BP 30 nm (AHF) under a 20x objective (W Plan-  
349 Apochromat, 1.0 NA, Zeiss). Data were acquired with custom software (ScanM by M. Müller  
350 and T. Euler running under IgorPro 6.3, Wavemetrics), taking 64 x 64 pixel images at 7.8 Hz.  
351 Light stimuli were presented through the objective from a DLP projector (K11, Acer), fitted  
352 with band-pass-filtered LEDs (amber, z 578 BP 10; and blue/UV, HC 405 BP 10,  
353 AHF/Croma), synchronized with the microscope's scanner. Stimulator intensity (as  
354 photoisomerization rate, 10<sup>4</sup> R\*/s/cone) was calibrated as described to range from 0.1 (LEDs  
355 off) to ~1.3 (Euler et al., 2009). Mostly due to two-photon excitation of photopigments, an  
356 additional, steady illumination component of ~10<sup>4</sup> R\*/s/cone was present during the  
357 recordings. The field of view was 100x100 $\mu\text{m}$ , imaging 50-100 cells in the ganglion cell layer  
358 simultaneously (Briggman and Euler, 2011). For juxtacellular spike recordings, OGB-1  
359 labeled somata were targeted with a 5 M $\Omega$  glass-pipette under dim IR illumination to  
360 establish a loose (<1G $\Omega$ ) seal. Signals were amplified using an Axopatch 200A amplifier  
361 (Molecular Devices) in I=0 mode and digitized at 10 kHz on a Digidata 1440A (Molecular  
362 Devices). Imaging and spike data were aligned offline using a trigger signal recorded in both  
363 acquisition systems, and spike times were extracted by thresholding. All procedures were  
364 performed in accordance with the law on animal protection (Tierschutzgesetz) issued by the  
365 German Federal Government and were approved by the institutional animal welfare  
366 committee of the University of Tübingen.

### 367 *Dataset from Svoboda lab*

368 We used a publicly available dataset provided by the GENIE project, Svoboda lab, at Janelia  
369 farm on crcns.org (Akerboom et al., 2012; Chen et al., 2013; Svoboda, 2014). This dataset

370 contains 9 cells recorded with GCaMP5, 11 cells recorded with GCaMP6f and 9 cells  
 371 recorded with GCaMP6s. The total number of spikes was 2735, 4536 and 2123, respectively,  
 372 and therefore much lower than for our datasets. Typically, these cells were recorded focusing  
 373 on a single cell rather than recording from an entire population with lower zoom as in our  
 374 dataset. For a detailed description of the data, see (Akerboom et al., 2012; Chen et al.,  
 375 2013).

### 376 **Preprocessing**

377 We normalized the sampling rate of all fluorescence traces and spike trains to 100 Hz,  
 378 resampling to time bins of 10 ms. This allowed us to apply models across datasets  
 379 independent of which dataset was used for training. We removed linear trends from the  
 380 fluorescence traces by fitting a robust linear regression with Gaussian scale mixture  
 381 residuals. That is, for each fluorescence trace  $F_t$ , we found parameters  $a, b, \pi_k$ , and  $\sigma_k$  with  
 382 maximal likelihood under the model

$$F_t = at + b + \varepsilon_t, \quad \varepsilon_t \sim \sum_{k=1 \dots K} \pi_k \mathcal{N}(\cdot; 0, \sigma_k^2),$$

383 and computed  $\tilde{F}_t = F_t - at - b$ . We used three different noise components ( $K = 3$ ).  
 384 Afterwards, we normalized the traces such that the 5<sup>th</sup> percentile of each trace's fluorescence  
 385 distribution is at zero, and the 80<sup>th</sup> percentile is at 1. Normalizing by percentiles instead of the  
 386 minimum and maximum is more robust to outliers and less dependent on the firing rate of the  
 387 neuron producing the fluorescence.

### 388 **Supervised learning in flexible probabilistic models for spike inference**

389 We predict the number of spikes  $k_t$  falling in the  $t$ -th time bin of a neuron's spike train based  
 390 on 1000 ms windows of the fluorescence trace centered around  $t$  (preprocessed  
 391 fluorescence snippets  $\mathbf{x}_t$ ). To reduce the risk of overfitting and to speed up the training  
 392 phase of the algorithm, we reduced the dimensionality of the fluorescence windows via PCA,  
 393 keeping enough principal components to explain at least 95% of the variance (which resulted  
 394 in 8 to 20 dimensions, depending on the dataset). Keeping 99% of the variance and slightly  
 395 regularizing the model's parameters gave similar results but was slower. Only for the  
 396 Svoboda dataset we found it was necessary to keep 99% of the variance to achieve optimal  
 397 results.

398 We assume that the spike counts  $k_t$  given the preprocessed fluorescence snippets  $\mathbf{x}_t$  can be  
 399 modeled using a Poisson distribution,

$$p(k_t | \mathbf{x}_t) = \frac{\lambda(\mathbf{x}_t)^{k_t}}{k_t!} e^{-\lambda(\mathbf{x}_t)}.$$

400

401 We tested three models for the firing rate  $\lambda(\mathbf{x}_t)$  function:

402 (1) A spike-triggered mixture (STM) model (Theis et al., 2013) with exponential  
 403 nonlinearity,

$$\lambda_{\text{STM}}(\mathbf{x}_t) = \sum_{k=1}^K \exp\left(\sum_{m=1}^M \beta_{km} (\mathbf{u}_m^\top \mathbf{x}_t)^2 + \mathbf{w}_k^\top \mathbf{x}_t + b_k\right),$$

404 where  $\mathbf{w}_k$  are linear filters,  $\mathbf{u}_m$  are quadratic filters weighted by  $\beta_{km}$  for each of  $K$   
405 components, and  $b_k$  is a offset for each component. We used three components and  
406 two quadratic features ( $K = 3, M = 2$ ). The performance of the algorithm was not  
407 particularly sensitive to the choice of these parameters (we evaluated  $K = 1, \dots, 4$  and  
408  $M = 1, \dots, 4$  in a grid search using one dataset).

409 (2) As a simpler alternative, we use the linear-nonlinear-Poisson (LNP) neuron with  
410 exponential nonlinearity,

$$\lambda_{\text{LNP}}(\mathbf{x}_t) = \exp(\mathbf{w}^\top \mathbf{x}_t + b),$$

411 where  $\mathbf{w}$  is a linear filter and  $b$  is an offset.

412 (3) As a more flexible alternative, we used a multi-layer neural network (ML-NN) with two  
413 hidden layers,

$$\lambda_{\text{ML-NN}}(\mathbf{x}_t) = \exp(\mathbf{w}_3^\top g(\mathbf{W}_2 g(\mathbf{W}_1 \mathbf{x}_t + \mathbf{b}_1) + \mathbf{b}_2) + b_3)$$

414 ,

415 where  $g(\mathbf{y}) = \max(0, \mathbf{y})$  is a point-wise rectifying nonlinearity and  $\mathbf{W}_1$  and  $\mathbf{W}_2$  are matrices.  
416 We tested MLPs with 10 and 5 hidden units, and 5 and 3 hidden units for the first and second  
417 hidden layer, respectively. Again, the performance of the algorithm was not particularly  
418 sensitive to these parameters.

419 Parameters of all models were optimized by maximizing the average log-likelihood for a  
420 given training set,

$$\frac{1}{N} \sum_{n=1}^N \log p(k_t | \mathbf{x}_t),$$

421 using limited-memory BFGS (Byrd et al., 1995), a standard quasi-Newton method. To  
422 increase robustness against potential local optima in the likelihood of the STM and the ML-  
423 NN, we trained four models with randomly initialized parameters and geometrically averaged  
424 their predictions. The geometric average of several Poisson distributions again yields a  
425 Poisson distribution whose rate parameter is the geometric average of the rate parameters of  
426 the individual Poisson distributions.

## 427 Other algorithms

### 428 *S108*

429 This approach is based on applying a support-vector machine (SVM) on two PCA features of  
430 preprocessed segments of calcium traces. We re-implemented the features following closely  
431 the procedures described in (Sasaki et al., 2008). As the prediction signal, we used the  
432 distance of the input features to the SVM's separating hyperplane, setting negative  
433 predictions to zero. We cross-validated the regularization parameter of the SVM but found  
434 that it had little impact on performance.

### 435 *PP14*

436 The algorithm performs Bayesian inference in a generative model, using maximum a  
437 posteriori (MAP) estimates for spike inference and MCMC on a portion of the calcium trace  
438 for estimating hyperparameters. We used a Matlab implementation provided by the authors

439 of (Pnevmatikakis et al., 2014). We also tried selecting the hyperparameters through cross-  
440 validation, which did not substantially change the overall results.

#### 441 *VP10*

442 The fast-oopsi or non-negative deconvolution technique constrains the inferred spike rates to  
443 be positive (Vogelstein et al., 2010), performing approximate inference in a generative  
444 model. We used the implementation provided by the author<sup>1</sup>. We adjusted the  
445 hyperparameters using cross-validation by performing a search over a grid of 54 parameter  
446 sets controlling the degree of assumed observation noise and the expected number of spikes  
447 (Fig. 2a-b). In Fig. 5b-c the hyperparameters were instead directly inferred from the calcium  
448 traces by the algorithm.

#### 449 *YF06*

450 The deconvolution algorithm (Yaksi and Friedrich, 2006) removes noise by local smoothing  
451 and the inverse filter resulting from the calcium transient. We used a Matlab implementation  
452 provided by the authors. Using the cross-validation procedure outlined above, we  
453 automatically tuned the algorithm by testing 66 different parameter sets. The parameters  
454 controlled the cutoff frequency of a low-pass filter, a time constant of the filter used for  
455 deconvolution, and whether or not an iterative smoothing procedure was applied to the  
456 fluorescence traces.

#### 457 *OD13*

458 This algorithm performs a template-matching based approach by using the finite rate of  
459 innovation-theory as described in (Oñativia et al., 2013). We used the implementation  
460 provided on the author's homepage<sup>2</sup>. We adjusted the exponential time constant parameter  
461 using cross-validation.

#### 462 *VP09*

463 This algorithm performs Bayesian inference in a generative model as described in  
464 (Vogelstein et al., 2009). We used the implementation provided by the author<sup>3</sup>. Since this  
465 algorithm is based on the same generative model as fast-oopsi but is much slower, we used  
466 the hyperparameters inferred by cross-validating fast-oopsi in Fig. 2a-b and the  
467 hyperparameters automatically inferred by the algorithm in Fig. 5b-c.

### 468 **Performance evaluation**

469 We evaluated the performance of the algorithms on spike trains binned at 40 ms resolution,  
470 i.e., a sampling rate of 25 Hz. For Fig. 3 and Suppl. Fig. 2, we changed the bin width  
471 between 10 ms (i.e. 100 Hz) and 500 ms (i.e. 2 Hz). We used cross-validation to evaluate the  
472 performance of our framework, i.e. we estimated the parameters of our model on a training  
473 set, typically consisting of all but one cell for each dataset, and evaluated its performance on  
474 the remaining cell. This procedure was iterated such that each cell was held out as a test cell  
475 once. Results obtained using the different training and test sets were subsequently  
476 averaged.

#### 477 *Correlation*

478 We computed the linear correlation coefficient between the true binned spike train and the  
479 inferred one. This is a widely used measure with a simple and intuitive interpretation, taking

---

<sup>1</sup> <https://github.com/jovo/fast-oopsi>

<sup>2</sup> [http://www.commsp.ee.ic.ac.uk/%7Epld/software//ca\\_transient.zip](http://www.commsp.ee.ic.ac.uk/%7Epld/software//ca_transient.zip)

<sup>3</sup> <https://github.com/jovo/smc-oopsi>



480 the overall shape of the spike density function into account. However, the correlation  
481 coefficient is invariant under affine transformations, which means that predictions optimized  
482 for this measure cannot be directly interpreted as spike counts or firing rates. In further  
483 contrast to information gain, it also does not take the uncertainty of the predictions into  
484 account. That is, a method which predicts the spike count to be 5 with absolute certainty will  
485 be treated the same as a method which experts the spike count to be somewhere between 0  
486 and 10 assigning equal probability to each possible outcome.

#### 487 *Information gain*

488 The information gain provides a model based estimate of the amount of information about  
489 the spike train extracted from the calcium trace. Unlike AUC and correlation, it takes into  
490 account the uncertainty of the prediction.

491 Assuming an average firing rate of  $\lambda$  and a predicted firing rate of  $\lambda_t$  at time  $t$ , the expected  
492 information gain (in bits per bin) can be estimated as

$$I_g = \frac{1}{T} \sum_t k_t \log_2 \frac{\lambda_t}{\lambda} + \lambda - \frac{1}{T} \sum_t \lambda_t$$

493 assuming Poisson statistics and independence of spike counts in different bins. The  
494 estimated information gain is bounded from above by the (unknown) amount of information  
495 about the spike train contained in the calcium trace, as well as by the marginal entropy of the  
496 spike train, which can be estimated using

$$H_m = \frac{1}{T} \sum_t \log(k_t!) - \lambda \log \lambda + \lambda.$$

497 We computed a relative information gain by dividing the information gain averaged over all  
498 cells by the average estimated entropy,

$$\frac{\sum_n I_g^{(n)}}{\sum_n H_m^{(n)'}}$$

499 where  $I_g^{(n)}$  is the information gain measured for the  $n$ -th cell in the dataset.

500 This can be interpreted as the fraction of entropy in the data explained away by the model  
501 (measured in percent points). Since only our method was optimized to yield Poisson firing  
502 rates, we allowed all methods a single monotonically increasing nonlinear function, which we  
503 optimized to maximize the average information gain over all cells. That is, we evaluated

$$\frac{1}{T} \sum_t k_t \log_2 \frac{f(\lambda_t)}{\lambda} + \lambda - \frac{1}{T} \sum_t f(\lambda_t),$$

504 where  $f$  is a piecewise linear monotonically increasing function optimized to maximize the  
505 information gain averaged over all cells (using an SLSQP implementation in SciPy).

#### 506 *AUC*

507 The AUC score can be computed as the probability that a randomly picked prediction for a  
508 bin containing a spike is larger than a randomly picked prediction for a bin containing no  
509 spike (Fawcett, 2006). While this is a commonly used score for evaluating spike inference

510 procedures (Vogelstein et al., 2010), it is not sensitive to changes in the relative height of  
511 different parts of the spike density function, as it is invariant under arbitrary strictly  
512 monotonically increasing transformations. For example, if predicted rates were squared, high  
513 rates would be over proportionally boosted compared to low rates, while yielding equivalent  
514 AUC scores.

### 515 **Statistical analysis**

516 We used generalized Loftus & Masson standard errors of the means for repeated measure  
517 designs (Franz and Loftus, 2012) and report the mean  $\pm$  2 SEM. To assess statistical  
518 significance, we compare the performance of the STM model to the performance of its next  
519 best competitor, performing a one-sided Wilcoxon signed rank test and report significance or  
520 the respective p-value above a line spanning the respective columns. If the STM is not the  
521 best model, we perform the comparison between the best model and the STM, coding the  
522 comparison in the color of the model. We fitted a Gaussian Process model with a Gaussian  
523 kernel in Fig. 5c and d using the implementation provided by scikit-learn. The kernel width is  
524 chosen automatically via maximum-likelihood estimate (Pedregosa et al., 2011).

### 525 **Generation of artificial data**

526 We simulated data by sampling from the generative model used by Vogelstein et al. (2010).  
527 That is, we first generated spike counts by independently sampling each bin of a spike train  
528 from a Poisson distribution, then convolving the spike train with an exponential kernel to  
529 arrive at an artificial calcium concentration, and finally adding Poisson noise to generate a  
530 Fluorescence signal  $x_t$ .

$$\begin{aligned}k_t &\sim \text{Poisson}(\lambda), \\C_t &= \gamma C_t + k_t, \\x_t &\sim \text{Poisson}(a C_t + b).\end{aligned}$$

531 The firing rate  $\lambda$  for each cell was randomly chosen to be between 0 and 400 spikes per  
532 second. The parameters  $\gamma$ ,  $a$ , and  $b$  were fixed to 0.98, 100 and 1, respectively, and data  
533 was generated at a sampling rate of 100 Hz.

### 534 **Code and data sharing**

535 All analysis was done in Python. We provide a Python implementation of our algorithm online  
536 ([www.bethgelab.org/code/spikeinference](http://www.bethgelab.org/code/spikeinference))<sup>5</sup>. The package includes a pre-trained version of  
537 our algorithm, which is readily usable even without simultaneous recordings and has been  
538 trained on our entire dataset. The pre-trained algorithm has been trained on all five datasets  
539 presented in this paper as well as the publicly available data from the Svoboda lab. To  
540 accommodate the wider range of data, we made the model slightly more flexible allowing 6  
541 linear and 4 quadratic components as well as accounting for 99% of the variance in the  
542 dimensionality reduction step.

543

---

<sup>4</sup> Please note that we are also preparing a Matlab implementation which will be released at a later point in time.

<sup>5</sup> Please note that we are also preparing a Matlab implementation which will be released at a later point in time.

## 544 **Acknowledgements**

545 We would like to thank J. Vogelstein, R. Friedrich, E. Pnevmtatikakis and P. Dragotti for  
546 making the code for their algorithms available.

547 This work was supported by the German Federal Ministry of Education and Research  
548 (BMBF) through the Bernstein Center for Computational Neuroscience (FKZ 01GQ1002 to  
549 T.E., M.B. and A.S.T.); the Deutsche Forschungsgemeinschaft (DFG) through grant BE3848-  
550 1 to M.B., BE 5601/1-1 to PB and BA 5283/1-1 to T.B.; the Werner Reichardt Centre for  
551 Integrative Neuroscience Tübingen (EXC307); grants NEI R01-EY018847, NEI P30-  
552 EY002520-33, and the NIH-Pioneer award DP1-OD008301 to A.S.T.; the McKnight Scholar  
553 Award to A.S.T.

## 554 **Author contributions**

555 PB, MB and LT designed the project. LT analyzed the data. MF, JR and AST acquired V1  
556 data. MR, TB and TE acquired retinal data. PB wrote the paper with input from all authors.  
557 PB and MB supervised the project.

**Table 1: Datasets**

| Data set | Area   | n                       | Indicator | Scan frequency | Scanning method | #spikes | sp/s | Field of view                                      |
|----------|--------|-------------------------|-----------|----------------|-----------------|---------|------|----------------------------------------------------|
| 1        | V1     | 16                      | OGB-1     | 322.5 ± 53.2   | 3D AOD          | 19,876  | 1.86 | 200x200 x100 μm <sup>3</sup>                       |
| 2        | V1     | 31                      | OGB-1     | 11.8 ± 0.9     | 2D galvo scan   | 32,385  | 2.47 | 250x250 μm <sup>2</sup>                            |
| 3        | V1     | 19 <sup>*</sup><br>(11) | GCamp6s   | 59.1           | 2D resonant     | 23,974  | 2.58 | 265x265 μm <sup>2</sup><br>135x135 μm <sup>2</sup> |
| 4        | Retina | 9                       | OGB-1     | 7.8            | 2D galvo scan   | 12,488  | 4.36 | 100x100 μm <sup>2</sup>                            |
| 5        | V1     | 15<br>(6)**             | GCamp6s   | 59.1           | 2D resonant     | 12,413  | 4.87 | 265x265 μm <sup>2</sup>                            |

\* For this dataset, 19 recordings were performed on 11 neurons

\*\* For this dataset, 15 recordings were performed on 6 neurons

**Table 2: Algorithms**

| Algorithm | Approach          | Technique              | Reference                    |
|-----------|-------------------|------------------------|------------------------------|
| STM       | Supervised        | STM                    | This paper                   |
| SI08      | Supervised        | PCA+SVM                | (Sasaki et al., 2008)        |
| PP14      | Generative        | MCMC sampling          | (Pnevmatikakis et al., 2014) |
| OD13      | Template matching | Finite rate innovation | (Oñativia et al., 2013)      |
| VP10      | Generative        | MAP estimation         | (Vogelstein et al., 2010)    |
| VP09      | Generative        | SMC sampling           | (Vogelstein et al., 2009)    |
| YF06      | Generative        | Deconvolution          | (Yaksi and Friedrich, 2006)  |

## References

- 558 Akerboom, J., Chen, T.-W., Wardill, T.J., Tian, L., Marvin, J.S., Mutlu, S., Calderon, N.C.,  
559 Esposti, F., Borghuis, B.G., Sun, X.R., et al. (2012). Optimization of a GCaMP Calcium  
560 Indicator for Neural Activity Imaging. *J. Neurosci.* *32*, 13819–13840.
- 561 Briggman, K.L., and Euler, T. (2011). Bulk electroporation and population calcium imaging in  
562 the adult mammalian retina. *J. Neurophysiol.* *105*, 2601–2609.
- 563 Byrd, R.H., Lu, P., Nocedal, J., and Zhu, C. (1995). A Limited Memory Algorithm for Bound  
564 Constrained Optimization. *SIAM J. Sci. Comput.* *16*, 1190–1208.
- 565 Chen, T.-W., Wardill, T.J., Sun, Y., Pulver, S.R., Renninger, S.L., Baohan, A., Schreiter,  
566 E.R., Kerr, R. a, Orger, M.B., Jayaraman, V., et al. (2013). Ultrasensitive fluorescent proteins  
567 for imaging neuronal activity. *Nature* *499*, 295–300.
- 568 Cotton, R.J., Froudarakis, E., Storer, P., Saggau, P., and Tolias, A.S. (2013). Three-  
569 dimensional mapping of microcircuit correlation structure. *Front. Neural Circuits* *7*, 151.
- 570 Denk, W., Strickler, J., and Webb, W. (1990). Two-photon laser scanning fluorescence  
571 microscopy. *Science* (80-. ). *248*, 73–76.
- 572 Diego, F., and Hamprecht, F.A. (2014). Sparse space-time deconvolution for calcium image  
573 analysis. In *Neural Information Processing Systems*, pp. 1–9.
- 574 Euler, T., Hausselt, S.E., Margolis, D.J., Breuninger, T., Castell, X., Detwiler, P.B., and Denk,  
575 W. (2009). Eyecup scope--optical recordings of light stimulus-evoked fluorescence signals in  
576 the retina. *Pflugers Arch.* *457*, 1393–1414.
- 577 Fawcett, T. (2006). An introduction to ROC analysis. *Pattern Recognit. Lett.* *27*, 861–874.
- 578 Franz, V.H., and Loftus, G.R. (2012). Standard errors and confidence intervals in within-  
579 subjects designs: generalizing Loftus and Masson (1994) and avoiding the biases of  
580 alternative accounts. *Psychon. Bull. Rev.* *19*, 395–404.
- 581 Froudarakis, E., Berens, P., Ecker, A.S., Cotton, R.J., Sinz, F.H., Yatsenko, D., Saggau, P.,  
582 Bethge, M., and Tolias, A.S. (2014). Population code in mouse V1 facilitates readout of  
583 natural scenes through increased sparseness. *Nat. Neurosci.* *17*, 851–857.
- 584 Greenberg, D.S., Houweling, A.R., and Kerr, J.N.D. (2008). Population imaging of ongoing  
585 neuronal activity in the visual cortex of awake rats. *Nat. Neurosci.* *11*, 749–751.
- 586 Grewe, B.F., Langer, D., Kasper, H., Kampa, B.M., and Helmchen, F. (2010). High-speed in  
587 vivo calcium imaging reveals neuronal network activity with near-millisecond precision. *Nat.*  
588 *Methods* *7*, 399–405.
- 589 Inoue, M., Takeuchi, A., Horigane, S., Ohkura, M., Gengyo-Ando, K., Fujii, H., Kamijo, S.,  
590 Takemoto-Kimura, S., Kano, M., Nakai, J., et al. (2014). Rational design of a high-affinity,  
591 fast, red calcium indicator R-CaMP2. *Nat. Methods* *12*.
- 592 Kerr, J.N.D., and Denk, W. (2008). Imaging in vivo: watching the brain in action. *Nat. Rev.*  
593 *Neurosci.* *9*, 195–205.



- 594 Kerr, J.N.D., Greenberg, D., and Helmchen, F. (2005). Imaging input and output of  
595 neocortical networks in vivo. *Proc. Natl. Acad. Sci. U. S. A.* *102*, 14063–14068.
- 596 Lütcke, H., Gerhard, F., Zenke, F., Gerstner, W., and Helmchen, F. (2013). Inference of  
597 neuronal network spike dynamics and topology from calcium imaging data. *Front. Neural*  
598 *Circuits* *7*, 201.
- 599 Maruyama, R., Maeda, K., Moroda, H., Kato, I., Inoue, M., Miyakawa, H., and Aonishi, T.  
600 (2014). Detecting cells using non-negative matrix factorization on calcium imaging data.  
601 *Neural Netw.* *55*, 11–19.
- 602 Oñativia, J., Schultz, S.R., and Dragotti, P.L. (2013). A finite rate of innovation algorithm for  
603 fast and accurate spike detection from two-photon calcium imaging. *J. Neural Eng.* *10*,  
604 046017.
- 605 Park, I.J., Bobkov, Y. V., Ache, B.W., and Principe, J.C. (2013). Quantifying bursting neuron  
606 activity from calcium signals using blind deconvolution. *J. Neurosci. Methods* *218*, 196–205.
- 607 Pedregosa, F., Varoquaux, G., Gramfort, A., Michel, V., Thirion, B., Grisel, O., Blondel, M.,  
608 Prettenhofer, P., Weiss, R., Dubourg, V., et al. (2011). Scikit-learn: Machine Learning in  
609 Python. *J. Mach. Learn. Res.* *12*, 2825–2830.
- 610 Pnevmatikakis, E.A., Merel, J., Pakman, A., and Paninski, L. (2013). Bayesian spike  
611 inference from calcium imaging data. *arXiv /q-bio.NC* 0–5.
- 612 Pnevmatikakis, E.A., Gao, Y., Soudry, D., Pfau, D., Lacefield, C., Poskanzer, K., Bruno, R.,  
613 Yuste, R., and Paninski, L. (2014). A structured matrix factorization framework for large scale  
614 calcium imaging data analysis. *arXiv /q-bio.NC* 1–21.
- 615 Reimer, J., Froudarakis, E., Cadwell, C.R., Yatsenko, D., Denfield, G.H., and Tolias, A.S.  
616 (2014). Pupil Fluctuations Track Fast Switching of Cortical States during Quiet Wakefulness.  
617 *Neuron* *84*, 355–362.
- 618 Sasaki, T., Takahashi, N., Matsuki, N., and Ikegaya, Y. (2008). Fast and accurate detection  
619 of action potentials from somatic calcium fluctuations. *J. Neurophysiol.* *100*, 1668–1676.
- 620 Stosiek, C., Garaschuk, O., Holthoff, K., and Konnerth, A. (2003). In vivo two-photon calcium  
621 imaging of neuronal networks. *Proc. Natl. Acad. Sci. U. S. A.* *100*, 7319–7324.
- 622 St-Pierre, F., Marshall, J.D., Yang, Y., Gong, Y., Schnitzer, M.J., and Lin, M.Z. (2014). High-  
623 fidelity optical reporting of neuronal electrical activity with an ultrafast fluorescent voltage  
624 sensor. *Nat. Neurosci.* *17*, 884–889.
- 625 Svoboda, K. (GENIE P. at J.F. (2014). Simultaneous imaging and loose-seal cell-attached  
626 electrical recordings from neurons expressing a variety of genetically encoded calcium  
627 indicators.
- 628 Theis, L., Chagas, A.M., Arnstein, D., Schwarz, C., and Bethge, M. (2013). Beyond GLMs: a  
629 generative mixture modeling approach to neural system identification. *PLoS Comput. Biol.* *9*,  
630 e1003356.
- 631 Thestrup, T., Litzlbauer, J., Bartholomäus, I., Mues, M., Russo, L., Dana, H., Kovalchuk, Y.,  
632 Liang, Y., Kalamakis, G., Laukat, Y., et al. (2014). Optimized ratiometric calcium sensors for  
633 functional in vivo imaging of neurons and T lymphocytes. *Nat. Methods* *11*, 175–182.

- 634 Valmianski, I., Shih, A.Y., Driscoll, J.D., Matthews, D.W., Freund, Y., and Kleinfeld, D.  
635 (2010). Automatic identification of fluorescently labeled brain cells for rapid functional  
636 imaging. *J. Neurophysiol.* *104*, 1803–1811.
- 637 Vogelstein, J.T., Watson, B.O., Packer, A.M., Yuste, R., Jedynak, B., and Paninski, L.  
638 (2009). Spike inference from calcium imaging using sequential Monte Carlo methods.  
639 *Biophys. J.* *97*, 636–655.
- 640 Vogelstein, J.T., Packer, A.M., Machado, T. a, Sippy, T., Babadi, B., Yuste, R., and Paninski,  
641 L. (2010). Fast nonnegative deconvolution for spike train inference from population calcium  
642 imaging. *J. Neurophysiol.* *104*, 3691–3704.
- 643 Wilt, B. a, Fitzgerald, J.E., and Schnitzer, M.J. (2013). Photon shot noise limits on optical  
644 detection of neuronal spikes and estimation of spike timing. *Biophys. J.* *104*, 51–62.
- 645 Yaksi, E., and Friedrich, R.W. (2006). Reconstruction of firing rate changes across neuronal  
646 populations by temporally deconvolved Ca<sup>2+</sup> imaging. *Nat. Methods* *3*, 377–383.
- 647
- 648

## Figure captions

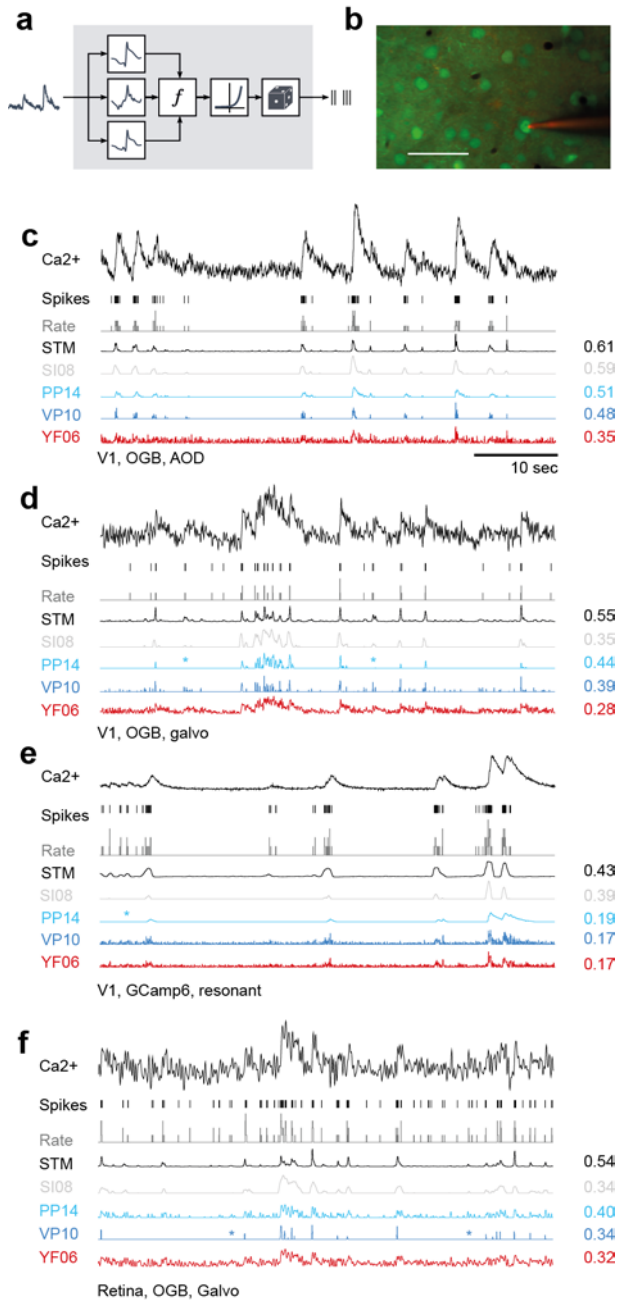

### Figure 1: Spike inference from calcium measurements

- Schematic of the probabilistic STM model.
- Simultaneous recording of spikes and calcium fluorescence traces in primary visual cortex of anesthetized mice. Green: Cells labeled with OGB-1 indicator. Red: Patch pipette filled with Alexa Fluor 594. Scale bar: 50  $\mu\text{m}$ .
- Example cell recorded from V1 using AOD scanner and OGB-1 as indicator. From top to bottom: Calcium fluorescence trace, spikes, spike rate in bins of 0.04 s (corresponding to sampling rate of 25 Hz; grey), inferred spike rate using the STM model (black), SI08, PP14, VP14 and YF06. All traces were scaled independently for clarity. On the right, correlation between the inferred and the original spike rate is shown.
- Example cell recorded from V1 using galvanometric scanners and OGB-1 as indicator. For legend, see c).
- Example cell recorded from V1 using resonance scanner and GCaMP6s as indicator. Note the different indicator dynamics. For legend, see c).
- Example cell recorded from the retina using galvanometric scanners and OGB-1 as indicator. For legend, see c).

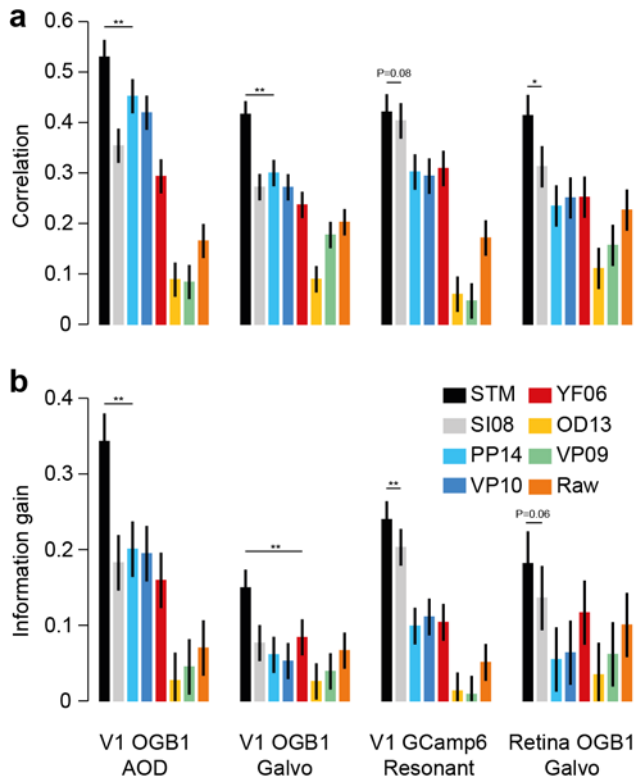

## Figure 2: Quantitative evaluation of spike inference performance

- a) Correlation (mean  $\pm$  2 SEM for repeated measure designs) between the true spike rate and the inferred spike rate for different algorithms (see legend for color code) evaluated on the four different datasets (with  $n=16$ ,  $31$ ,  $19$  and  $9$ , respectively). Markers above bars show the result of a Wilcoxon sign rank test between the STM model and its closest competitor (see *Methods*, \* denotes  $P<0.05$ , \*\* denotes  $P<0.01$ ). The evaluation was performed in bins of  $0.04$  s (corresponding to sampling rate of  $25$  Hz).
- b) Information gained about the true spike train by observing the calcium trace, evaluated for different algorithms.

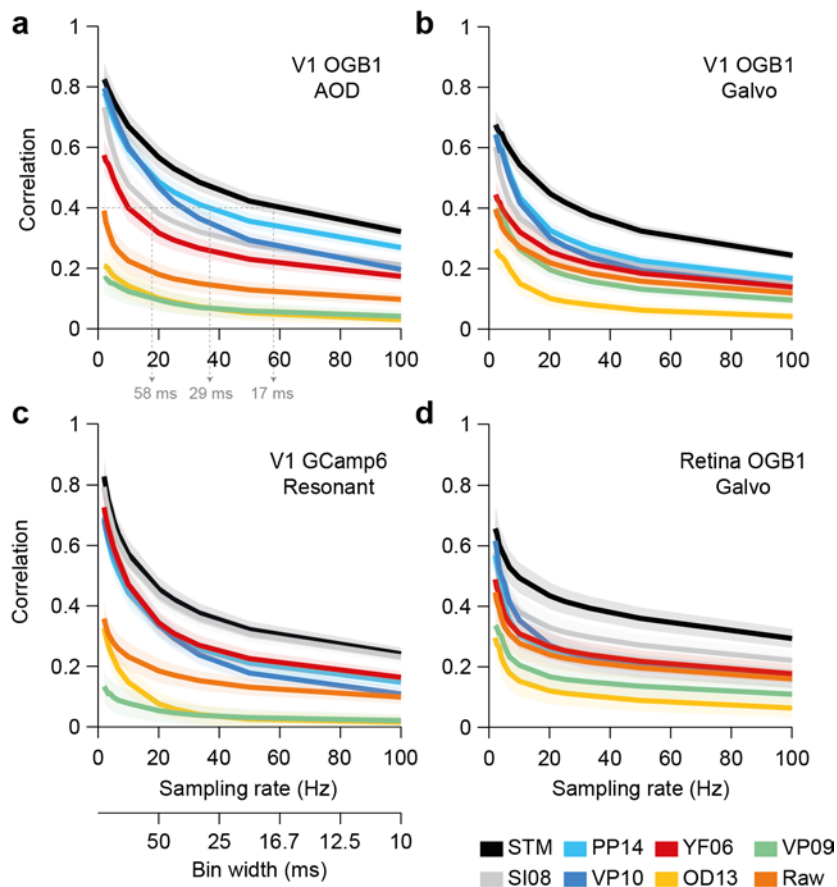

### Figure 3: Timing accuracy of spike rate inference

Correlation (mean  $\pm$  2 SEM for repeated measure designs) between the true and inferred spike rate as a function of sampling rate (i.e. temporal resolution) for all four datasets (a-d) with  $n=16, 31, 19$  and  $9$ , respectively. See legend for color code.



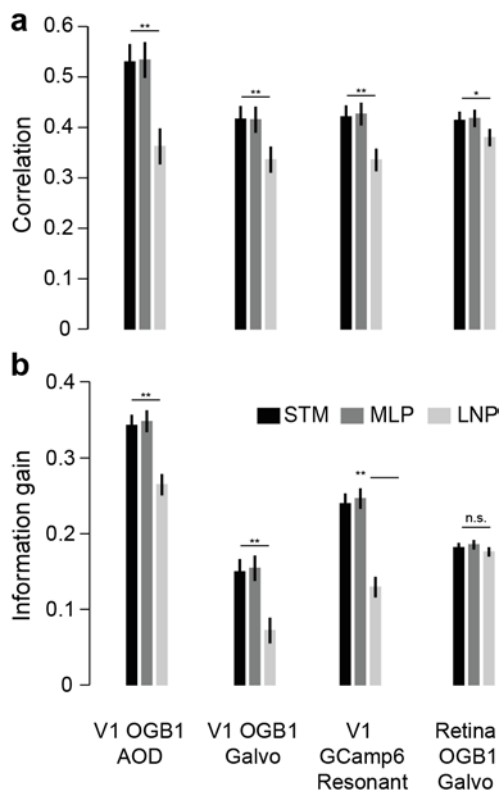

**Figure 4: Evaluating model complexity**

- 649 a) Correlation (mean  $\pm$  2 SEM for repeated measure designs) between the true and inferred  
650 spike rate comparing the STM model (black) with a flexible multilayer neural network  
651 (dark grey) and a simple LNP model (light grey) evaluated on the four different datasets  
652 (with  $n=16, 31, 19$  and  $9$ , respectively). Markers above bars show the result of a  
653 Wilcoxon signed rank test between the STM model and the LNP model (see *Methods*, \*  
654 denotes  $P<0.05$ , \*\* denotes  $P<0.01$ ). The evaluation was performed in bins of 40 ms  
655 (corresponding to sampling rate of 25 Hz).
- b) Information gained about the true spike train by observing the calcium trace performing  
the same model comparison described in a).

656

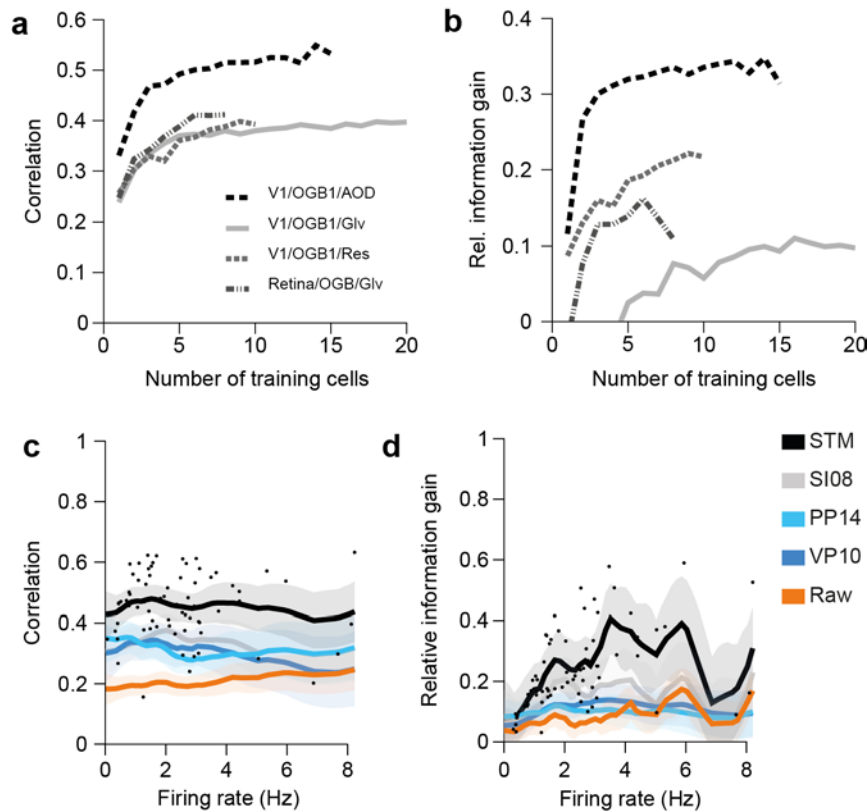

657

**Figure 5: Dependence on training set size and firing rate**

- Mean correlation for STM model on the four different datasets as a function of training set size.
- Mean relative information gain for STM model on the four different datasets as a function of training set size.
- Correlation as a function of average firing rate of a cell. Dots mark correlation of STM model for individual traces. Solid lines indicate mean of a Gaussian process fit to correlation values for each of the indicated algorithms. Shaded areas are 95%-CI.
- As in c. for relative information gain.

658

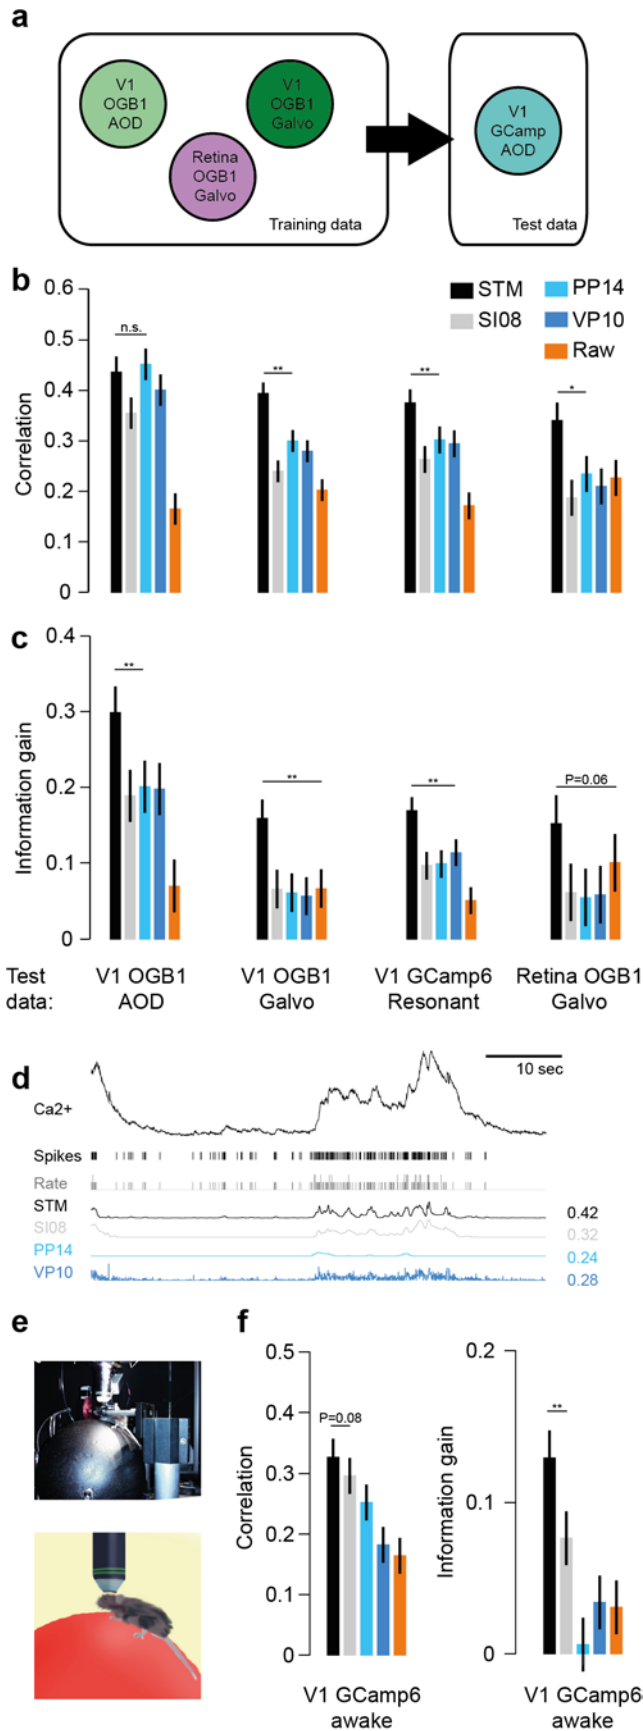

**Figure 6: Spike inference without training data**

- a) Schematic illustrating the setup: The algorithms are trained on all cells from three datasets (here: all but the GCaMP dataset) and evaluated on the remaining dataset (here: the GCaMP dataset), testing how well it generalizes to settings it has not seen during training.
- b) Correlation (mean  $\pm$  2 SEM for repeated measure designs) between the true spike rate and the inferred spike density function for a subset of the algorithms (see legend for color code) evaluated on each of the four different datasets (with  $n=16, 31, 19$  and  $9$ , respectively), trained on the remaining three. Markers above bars show the result of a Wilcoxon sign rank test between the STM model and its closest competitor (see *Methods*, \* denotes  $P<0.05$ , \*\* denotes  $P<0.01$ ). The evaluation was performed in bins of 40 ms (corresponding to sampling rate of 25 Hz).
- c) Information gained about the true spike train by observing the calcium trace performing the generalization analysis described in a).
- d) Example recording as in Fig. 1 but for data recorded in an awake animal using GCaMP6 as indicator. Algorithms were trained on anesthetized data and tested on awake data.
- e) Photograph and illustration of a mouse sitting on a Styrofoam ball during a combined imaging/electrophysiology experiment.
- f) Performance comparison as in b and c for awake data ( $n=15$ ) when algorithms were trained on anesthetized data.

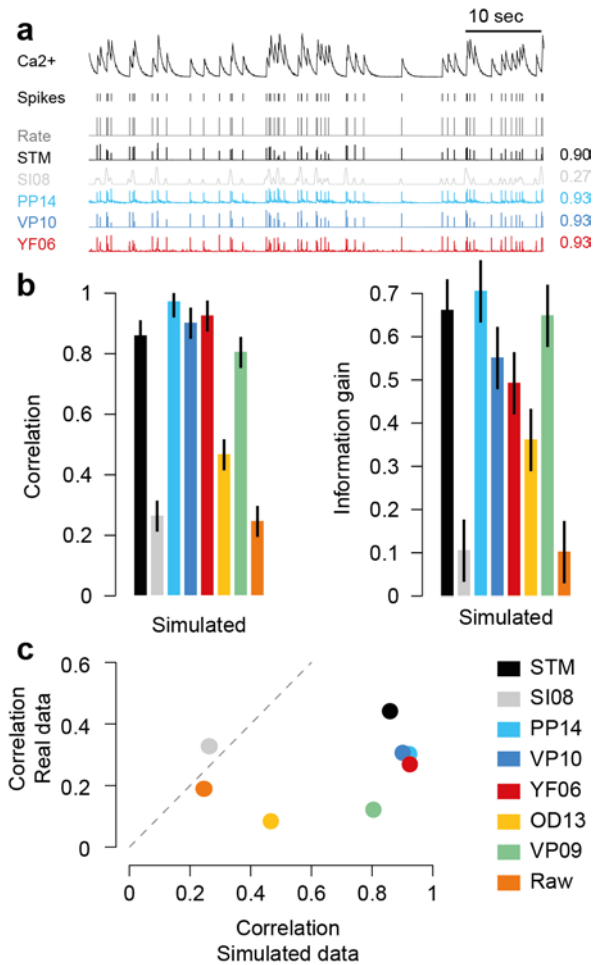

### Figure 7: Evaluating algorithms on artificial data

- Example trace sampled from a generative model, true spikes and binned rate as well as reconstructed spike rate from four different algorithms (conventions as in Fig. 1). Numbers on the right denote correlations between true and inferred spike trains.
- Correlation (mean  $\pm$  2 SEM for repeated measure designs) and information gain computed on a simulated dataset with 20 traces. For algorithms see legend.
- Scatter plot comparing performance on simulated data with that on real data (averaged over cells from all datasets), suggesting little predictive value of performance on simulated data.
